# Supplementary material for: The CO 2 release and Oxygen uptake from Fossil Fuel Emission Estimate (COFFEE) dataset: effects from varying oxidative ratios
Source: Copernicus journal article supplement (doi:10.5194/acp-11-6855-2011), 2011-07-18
Supplement: Supplementary file 1 [file acp-11-6855-2011-supplement.pdf]

## Supplement to:

### **The CO<sub>2</sub> release and Oxygen uptake from Fossil Fuel Emission Estimate (COFFEE) dataset: Effects from varying oxidative ratios**

**J. Steinbach<sup>1,3</sup>, C. Gerbig<sup>1</sup>, C. Rödenbeck<sup>1</sup>, U. Karstens<sup>1</sup>, C. Minejima<sup>2,4</sup>, H. Mukai<sup>2</sup>**

<sup>1</sup> Max Planck Institute for Biogeochemistry, Jena, Germany

<sup>2</sup> Center for Global Environmental Research, National Institute for Environmental Studies, Tsukuba, Japan

<sup>3</sup> now at: Stockholm University, Department of Applied Environmental Science, Stockholm, Sweden

<sup>4</sup> now at: Tokyo University of Agriculture and Technology, Department of Chemical Engineering, Tokyo, Japan

This supplement contains:

- Table 1, referring to the creation of the COFFEE dataset as described in Section 2 of the paper. The table contains an overview of EDGAR usage types and corresponding UN categories, with some information how the usage types of the two datasets were merged.
- Figure S1, referring to the model simulations in Section 4.1. The figure compares simulations from the global model TM3 and the regional model REMO to observations at the station Ochsenkopf in Germany.

| EDGAR 3.2 usage type |                                                                                                 | Corresponding UN usage type(s)              |                                                                                                                                                                                                                               |
|----------------------|-------------------------------------------------------------------------------------------------|---------------------------------------------|-------------------------------------------------------------------------------------------------------------------------------------------------------------------------------------------------------------------------------|
| code                 | description                                                                                     | code                                        | description                                                                                                                                                                                                                   |
| F10/<br>B10          | Fossil fuel use/ Biofuel combustion: Industry (excluding coke ovens, refineries, etc.)          | 0911<br>0914<br>0924<br>121<br>084          | Consumption by mining industry<br>Consumption by biogas plants<br>Consumption by blast furnaces<br>Consumption by industry & construction<br>Conversion in blast furnaces                                                     |
| F20/<br>B20          | Fossil fuel use/ Biofuel combustion: Power generation (public and auto; including cogeneration) | 0927<br><br>0928<br>088                     | Consumption by thermal power plants & auxiliaries<br>Consumption by other energy producers<br>Conversion in thermal power plants                                                                                              |
| F30                  | Fossil fuel use: Other transformation sector (refineries, coke ovens, gas works etc.)           | 0913<br>0921<br>0922<br>0923<br>0925<br>089 | Consumption by natural gas fields & plants<br>Consumption by coke ovens<br>Consumption by gasworks<br>Consumption by briquetting plants<br>Consumption by petroleum refineries<br>Conversion by other energy-producing plants |
| F40/<br>B40          | Fossil fuel use/ Biofuel combustion: Residential, Commercial and Other sector (RCO)             | 123                                         | Consumption by households and other consumers                                                                                                                                                                                 |
| F51<br>F54<br>F57    | Fossil fuel use: Transport (Road,Rail, Inland water, Pipeline, Non-specified, Air)              | 122                                         | Consumption by transportation industry (road, rail, inland water ways, air, other)                                                                                                                                            |
| F58                  | Fossil fuel use: International shipping                                                         | 05                                          | Bunkers/international shipping                                                                                                                                                                                                |
| F61<br>F62           | Fossil fuel use:non energy use CO <sub>2</sub> / feedstocks                                     | 11                                          | Consumption for non-energy uses                                                                                                                                                                                               |
| F80                  | Fossil fuel use: Oil production, transmission and handling, gas flaring                         | 0912<br>104                                 | Consumption by crude petroleum fields<br>Natural gas - Flared and vented                                                                                                                                                      |

Table 1: Overview of EDGAR 3.2 categories and their corresponding UN usage types. The “F” in the code of the EDGAR usage types indicates “Fossil fuel use”. In addition, for three usage types also emissions from biomass combustion are given, these are labeled with a “B” in the usage type code (B10, B20 and B40).

The EDGAR and UN usage types were first matched according to the category/usage type description. It can be seen that in most cases the UN dataset has a more detailed separation of usage types than EDGAR, so mostly several UN usage types were aggregated to match those from EDGAR. Based on a comparison of the resulting CO<sub>2</sub> emissions per usage type, some adjustments in the matching were made. The table shows the matching that gave the best agreement of the two datasets on global and country level.

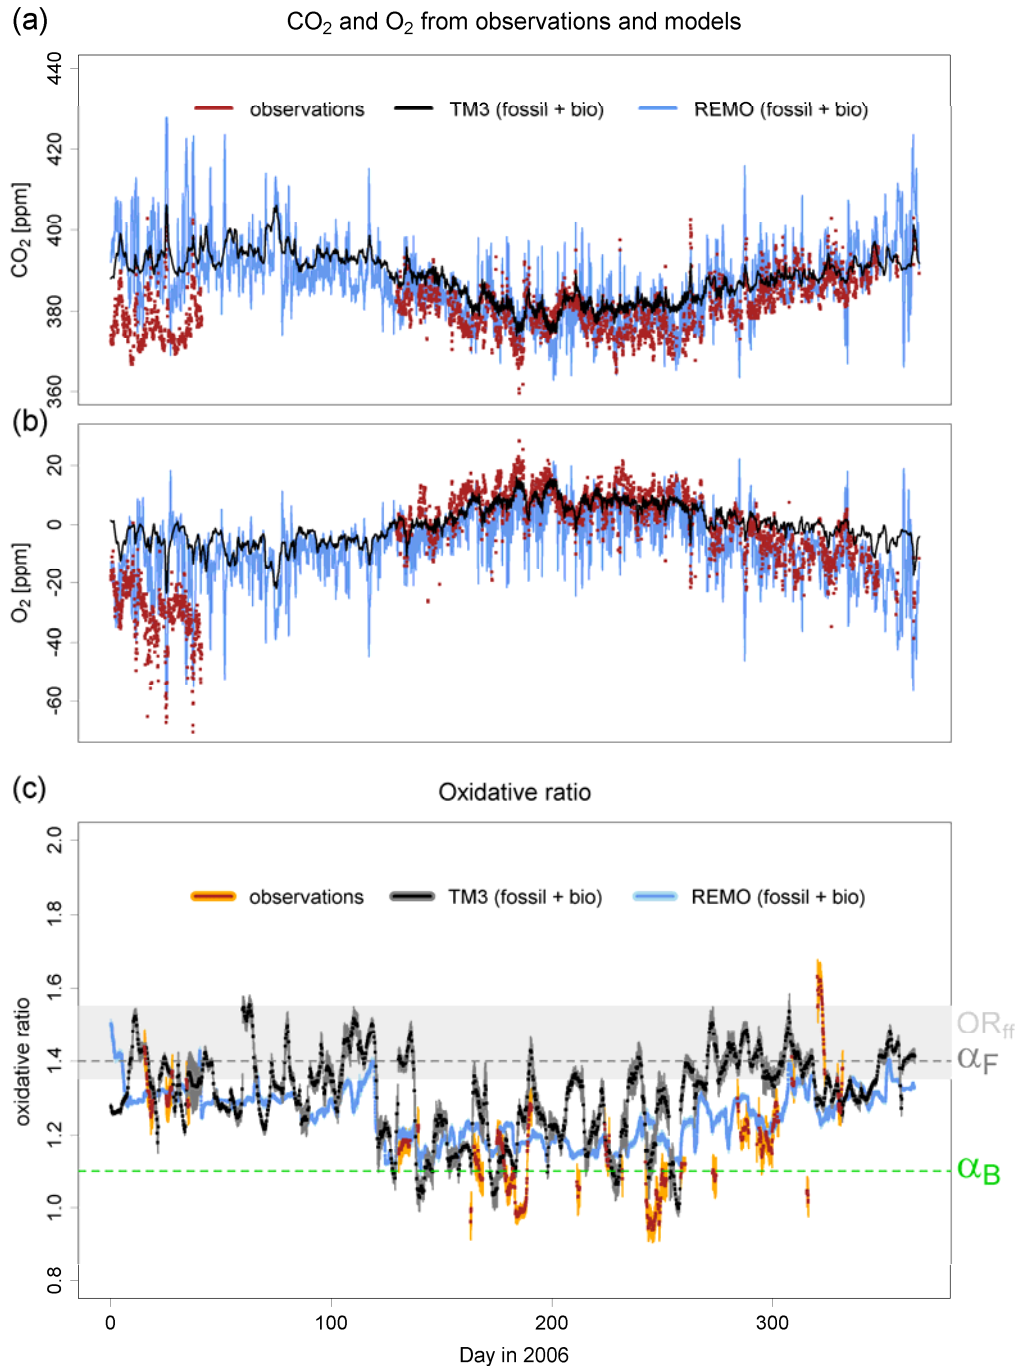

Figure S1: Comparison of observed and simulated CO<sub>2</sub> (a) and O<sub>2</sub> (b) mixing ratios and oxidative ratios (c) at the station Ochsenkopf in Germany.

This plot is an addition to Figure 5 in the paper. Figure 5 has shown the simulated fossil fuel signals and the fossil fuel related oxidative ratio  $OR_{ffp}$  at the Ochsenkopf (OXK) station, indicating the different sensitivities of the global model TM3 and the regional model REMO. As the atmospheric signal at OXK is strongly influenced by biospheric processes, model simulations also need to include the biospheric component in order to be compared to observations. Here the upper two plots show

CO<sub>2</sub> (a) and O<sub>2</sub> (b) simulations from TM3 (black) and REMO (blue), including the fossil-fuel-related and the biospheric component (the ocean component is negligible here). Observational data (courtesy of R. Thompson and the MPI-BGC tall tower group, see also (Thompson et al., 2009)) is added to the plots in brown. Plot (c) shows the oxidative ratios, derived from simulations and observations using the same 5-day running regression as used in Figure 5c. A clear seasonal cycle is seen in the CO<sub>2</sub> and O<sub>2</sub> signals as well as in the oxidative ratio. In the summer, the oxidative ratio is closer to the biospheric value ( $\alpha_B = 1.1^*$ , indicated by the green line), while the fossil fuel influence dominates in the winter (the grey line shows the global average value  $\alpha_F = 1.4$ , the shaded area indicates the range of OR<sub>ffp</sub> at OXK, derived from the model simulations). This seasonal variation is captured equally well by both models. However, comparing the overall signal to the fossil fuel simulations in Figure 5, it can be seen that the synoptic variability – in the CO<sub>2</sub> and O<sub>2</sub> signals themselves as well as in the oxidative ratio – is mostly dominated by biospheric signals and atmospheric dynamics rather than by fossil fuel events. The fact that the total oxidative ratio is smaller than OR<sub>ffp</sub>/ $\alpha_F$  most of the time also indicates that some biospheric influence is present all of the time, even in the winter months.

---

\*Note that this value is also a global average: Depending on local plant types and dominating processes, OR<sub>bio</sub> can also exhibit variations that are not accounted for in the models. For discussions on this issue and the range of observed OR<sub>bio</sub> see for example: Seibt et al., 2004; Sturm et al., 2006; Stephens, 2007; Popa, 2008.

---

#### *References:*

- Popa, M. E.: Continuous tall tower multispecies measurements in Europe for quantifying and understanding land-atmosphere carbon exchange, PhD thesis, Friedrich-Schiller-Universitaet, Jena, 237p pp., 2008.
- Seibt, U., Brand, W. A., Heimann, M., Lloyd, J., Severinghaus, J. P., and Wingate, L.: Observations of O<sub>2</sub> : CO<sub>2</sub> exchange ratios during ecosystem gas exchange, *Global Biogeochemical Cycles*, 18, GB4024, doi:4010.1029/2004GB002242, 2004.
- Stephens, B. B.: Application of a Differential Fuel-Cell Analyzer for Measuring Atmospheric Oxygen Variations, *Journal of Atmospheric and Oceanic Technology*, 24, 82-93, 2007.
- Sturm, P., Leuenberger, M., Valentino, F. L., Lehmann, B., and Ihly, B.: Measurements of CO<sub>2</sub>, its stable isotopes, O<sub>2</sub>/N<sub>2</sub>, and <sup>222</sup>Rn at Bern, Switzerland, *Atmos. Chem. Phys.*, 6, 1991-2004, doi:10.5194/acp-6-1991-200, 2006.
- Thompson, R. L., Manning, A. C., Gloor, M., Schultz, U., Seifert, T., Haensel, F., Jordan, A., and Heimann, M.: In-situ measurements of oxygen, carbon monoxide and greenhouse gases from Ochsenkopf tall tower in Germany, *Atmospheric Measurement Techniques*, 2, 573–591, 2009.
